# Supplementary material for: Serine-mediated hydrazone ligation displaying insulin-like peptides on M13 phage pIII
Source: Royal Society of Chemistry journal article supplement (doi:10.1039/d3ob01487h), 2023-01-01
Supplement: d3ob01487h1.pdf [file d3ob01487h1.pdf]

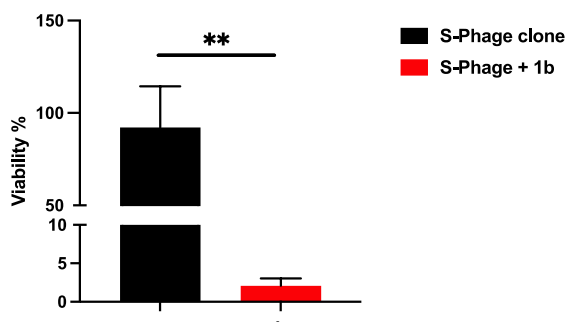

**Figure S1. The phage viability change before and after ligation with 1b.** Data represent the average of 3 independent measurements. Error bars represent the standard deviation. (\*\* $p < 0.01$ , two-tailed t test)

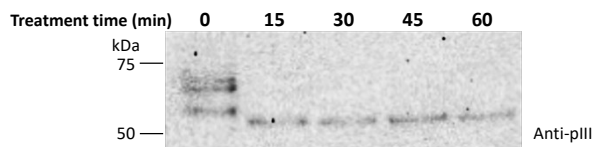

**Figure S2. Introduction of a trypsin spacer to improve viability.** Western blot showing insulin was removed from phage pIII after trypsin treatment.
